# Supplementary material
Source: publisher figshare collection journal article supplement (https://diabetesjournals.figshare.com/articles/dataset/_/23565045)
Supplement: Supplementary file 1 [file 1]

**Table S1 – Baseline clinical and metabolic characteristics of recently diagnosed patients with type 1 diabetes. \***

|                                                                                  | <b>Males</b> | <b>Females</b> | <b><i>p</i></b> |
|----------------------------------------------------------------------------------|--------------|----------------|-----------------|
| n                                                                                | 161          | 105            | -               |
| Age (years)                                                                      | 18 ± 8       | 19 ± 9         | ns              |
| Body weight (kg)                                                                 | 62 ± 21      | 55 ± 15        | 0.0018          |
| BMI (kg/m <sup>2</sup> )                                                         | 21.7 ± 4.2   | 21.4 ± 4.1     | ns              |
| Fasting glucose (mmol/L)                                                         | 6.1 ± 1.4    | 6.4 ± 1.6      | ns              |
| 2-hour glucose (mmol/L)                                                          | 10.3 ± 3.1   | 11.5 ± 3.1     | 0.0015          |
| HbA <sub>1c</sub> (%)                                                            | 7.1 ± 1.4    | 7.1 ± 1.4      | ns              |
| Insulin dose (U·kg <sup>-1</sup> ·d <sup>-1</sup> )                              | 0.33 ± 0.20  | 0.41 ± 0.25    | 0.0477          |
| Fasting C-peptide (pmol/L)                                                       | 326 [247]    | 356 [257]      | ns              |
| C-peptide AUC (nmol·L <sup>-1</sup> ·h <sup>-1</sup> )                           | 2.59 [1.70]  | 2.85 [1.83]    | ns              |
| C-peptide incremental AUC (nmol·L <sup>-1</sup> ·h <sup>-1</sup> )               | 1.26 [1.06]  | 1.65 [1.13]    | 0.0112          |
| Fasting insulin secretion rate (pmol·min <sup>-1</sup> ·m <sup>-2</sup> )        | 48 [36]      | 55 [41]        | ns              |
| Insulin secretion AUC <sub>2h</sub> (nmol·m <sup>-2</sup> )                      | 14.3 [8.4]   | 17.1 [8.7]     | 0.0110          |
| Glucose sensitivity (pmol·min <sup>-1</sup> ·m <sup>-2</sup> ·mM <sup>-1</sup> ) | 12.3 [17.9]  | 15.0 [15.7]    | ns              |
| Rate sensitivity (pmol·m <sup>-2</sup> ·mM <sup>-1</sup> )                       | 268 [312]    | 275 [371]      | ns              |
| Potential ratio                                                                  | 1.20 [0.44]  | 1.18 [0.42]    | ns              |

\*entries are mean ± SD or median [interquartile range]
