# Supplementary material
Source: publisher figshare collection journal article supplement (https://diabetesjournals.figshare.com/articles/dataset/_/23565045)
Supplement: Supplementary file 2 [file 1]

### **Legends: Supplemental Figures**

**Figure S1** – Time-course of metabolic parameters. Plots are mean  $\pm$  SE ( $\pm$ SD for the time scale).

**Figure S2** – Probability of exceeding a HbA<sub>1c</sub> value of 7% (**a**) or a value of  $\beta$ -cell glucose sensitivity ( $\beta$ GS) dropping by more than 10% from baseline (**b**) throughout follow up by fasting C-peptide level.

**Figure S3** – Reciprocal relation of exogenous insulin dose with MMTT insulin output (*top*) and  $\beta$ -cell glucose sensitivity (*bottom*) throughout the observation period (1,427 records). Shaded areas are 95% confidence intervals for the log-normal fit.
